# Supplementary material for: Performance evaluation of four cascade impactors for airborne ultrafine-particle (UFP) collection: the influence of particle type, concentration, mass, and chemical nature
Source: Copernicus journal article supplement (doi:10.5194/ar-3-45-2025), 2025-01-27
Supplement: Supplementary file 1 [file ar-3-45-2025-supplement.pdf]

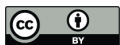

*Supplement of*

**Performance evaluation of four cascade impactors for airborne ultrafine-particle (UFP) collection: the influence of particle type, concentration, mass, and chemical nature**

**Elisabeth Eckenberger et al.**

*Correspondence to:* Elisabeth Eckenberger ([elisabeth.eckenberger@uni-bayreuth.de](mailto:elisabeth.eckenberger@uni-bayreuth.de)) and Anke C. Nölscher ([anke.noelscher@uni-bayreuth.de](mailto:anke.noelscher@uni-bayreuth.de))

The copyright of individual parts of the supplement might differ from the article licence.

**Table S1: Overview of HPLC methods applied for mass based chemical analysis applied on the environmental UFP samples.**

| <b>Parameter</b>        | <b>HPLC-MS neg</b>                                                                                                            | <b>HPLC-MS pos</b>                                                                                                              | <b>HPLC-FLD</b>                                                                                                                                               |
|-------------------------|-------------------------------------------------------------------------------------------------------------------------------|---------------------------------------------------------------------------------------------------------------------------------|---------------------------------------------------------------------------------------------------------------------------------------------------------------|
| Analytical column       | Gemini 5u C18 110A<br>(150 mm x 4.6 mm, 5 μm)                                                                                 | Gemini 5u C18 110A<br>(150 mm x 4.6 mm, 5 μm)                                                                                   | EC 125/4 Nucleosil 100-5 C18 HD<br>(125 mm x 4 mm, 5 μm)                                                                                                      |
| Column temperature      | 40 °C                                                                                                                         | 30 °C                                                                                                                           | 30 °C                                                                                                                                                         |
| Injection volume        | 20 μL                                                                                                                         | 20 μL                                                                                                                           | 25 μL                                                                                                                                                         |
| Autosampler temperature | –                                                                                                                             | –                                                                                                                               | -5 °C                                                                                                                                                         |
| Flow rate               | 0.5 mL/min                                                                                                                    | 0.3 - 0.5 mL/min                                                                                                                | 1 mL/min                                                                                                                                                      |
| Gradient                | <b>A) 80% ACN, B) 4 mM HCOOH</b><br>0 min 5% A<br>1 min 5% A<br>18 min 50% A<br>21 min 100% A<br>29 min 100% A<br>31 min 5% A | <b>A) 80%MeOH, B) 4 mM HCOOH</b><br>0 min 50% A<br>3 min 80% A<br>12 min 100% A<br>18 min 90% A<br>20 min 50% A<br>25 min 75% A | <b>A) ACN, B) H<sub>2</sub>O (Milli-pore)</b><br>0 min 60% A<br>5 min 70% A<br>8 min 70% A<br>12 min 80% A<br>15 min 80% A<br>19 min 90% A<br>22 min 60% A    |
| Detector                | MSD<br><b>Time ESI(-)-m/z-ions</b><br>0 min 207<br>8 min 111, 157, 171, 185<br>18 min 121, 135, 183<br>25 min 193, 217        | MSD<br><b>Time ESI(+)-m/z-ions</b><br>0 min 212, 227, 269<br>12 min 257, 261, 299                                               | FLD<br><b>Time λ<sub>ex</sub> / λ<sub>em</sub> [nm]</b><br>0 min 259 / 386<br>3.3 min 242 / 388<br>5.8 min 250 / 370<br>7.5 min 270 / 390<br>13 min 290 / 430 |

35

**Table S2: Summary of Considered Uncertainties and Their Contributions**

| <b>Source of Uncertainty</b>                     | <b>Relative Uncertainty (%)</b> |
|--------------------------------------------------|---------------------------------|
| Relative Standard Deviation of Repeated Analysis | 2                               |
| Errors from Reference Material                   | 0.5                             |
| Errors from Self-Prepared Stock Solutions        | 5                               |
| Dilution Errors                                  | 5                               |
| Calibration Uncertainty                          | 5                               |
| Inaccuracies from Balance and Pipette            | 1                               |

40

**Table S3: Specifications regarding the different marker compounds that were analyzed and chosen for this study.**

| Marker | Method          | Recovery | LOD <sub>Air</sub><br>[pg/m <sup>3</sup> ] |                     | LOD <sub>Instrument</sub><br>[pg] | External standard<br>calculation |                |
|--------|-----------------|----------|--------------------------------------------|---------------------|-----------------------------------|----------------------------------|----------------|
|        |                 |          | 43.2 m <sup>3</sup>                        | 5.76 m <sup>3</sup> |                                   | Response<br>factor<br>[AU/μg/L]  | R <sup>2</sup> |
| Levo   | HPLC-MS<br>neg  | 86 ± 9%  | 130.09                                     | 975.67              | 5619.89                           | 442.68                           | 0.99           |
| PA     | HPLC-MS<br>neg  | 84±6%    | 186.57                                     | 1399.28             | 8059.82                           | 4415.4                           | 0.99           |
| TA     | HPLC-MS<br>neg  | 85±6%,   | 171.76                                     | 1288.20             | 7420.03                           | 3352.9                           | 0.99           |
| 6PPD   | HPLC-MS<br>pos  | 75±7%    | 40.17                                      | 301.26              | 1735.34                           | 26766                            | 0.98           |
| BaP    | HPLC-<br>FLD/UV | 78±5%    | 1.62                                       | 12.15               | 69.98                             | 10.116                           | 1.00           |
| BbF    | HPLC-<br>FLD/UV | 74±4%    | 1.16                                       | 8.70                | 50.11                             | 12.15                            | 1.00           |

45

50

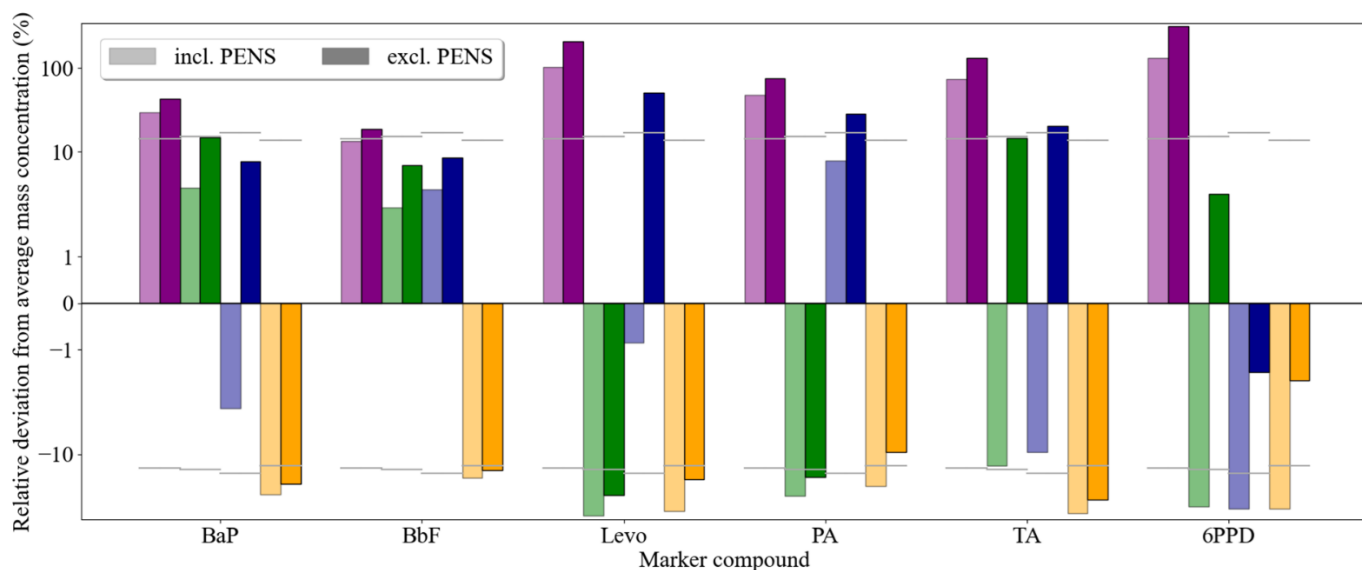

**Figure S1: logarithmic representation of Fig. 6b.**

55

### Sect.S1.1 Estimation of Impactor Uncertainties

To accurately assess the overall measurement uncertainty associated with the various impactors used in our study, we applied Gaussian error propagation. The overall chemical analysis error was 9% for all impactors. For the Ultra MOUDI impactor, in addition to the analysis error, the flow error was 10% and the handling error was increased to 10%. This adjustment leads to a total measurement uncertainty for the Ultra MOUDI of approximately 16.76%. The ELPI impactor had a flow error of 3% and an increased handling error of 15%, resulting in a total measurement uncertainty of around 17.75%. For the 120R MOUDI impactor, the flow error was 3% and the handling error was increased to 10%, leading to a total measurement uncertainty of approximately 13.78%. For the PENS impactor, the flow error was 5% and the handling error was increased to 10%, resulting in a total measurement uncertainty of approximately 14.35%.

65
